# Supplementary material
Source: PubMed Central journal article supplement (PMC9685546)

## Online Supplementary Material

Di Benedetto F, Magistri P, Di Sandro S, et al; Robotic HPB Study Group. Safety and efficacy of robotic vs open liver resection for hepatocellular carcinoma. *JAMA Surg*. Published online November 23, 2022. doi:10.1001/jamasurg.2022.5697

**eTable 1.** Resection Type Before and After Propensity Score Matching

**eTable 2.** Multivariable Cox Proportional Hazards Regression for Overall Survival (OS)

**eFigure.** Overall Survival and Cumulative Incidence of Death Related to Tumor Recurrence After Propensity Score Matching by Type of Surgery Among Patients Within Milan Criteria

This supplemental material has been provided by the authors to give readers additional information about their work

**eTable 1. Resection type, before and after propensity score matching**

| Variable              | Level                              | Before propensity score matching |                 | After propensity score matching |                 |
|-----------------------|------------------------------------|----------------------------------|-----------------|---------------------------------|-----------------|
|                       |                                    | Open (N=240)                     | Robotic (N=158) | Open (N=106)                    | Robotic (N=106) |
| Resection type, N (%) | Wedge                              | 60 (25.0)                        | 37 (23.4)       | 40 (37.7)                       | 19 (17.9)       |
|                       | Segmentectomy                      | 101 (42.1)                       | 57 (36.1)       | 39 (36.8)                       | 40 (37.7)       |
|                       | Bisegmentectomy                    | 28 (11.7)                        | 11 (7.0)        | 12 (11.3)                       | 6 (5.7)         |
|                       | Left lateral sectionectomy         | 12 (5.0)                         | 18 (11.4)       | 5 (4.7)                         | 16 (15.1)       |
|                       | Right posterior sectionectomy      | 0 (0)                            | 9 (5.7)         | 0 (0)                           | 8 (7.5)         |
|                       | Left hepatectomy                   | 8 (3.3)                          | 12 (7.6)        | 1 (0.9)                         | 9 (8.5)         |
|                       | Right hepatectomy                  | 24 (10.0)                        | 11 (7.0)        | 6 (5.7)                         | 6 (5.7)         |
|                       | Extended right hepatectomy         | 6 (2.5)                          | 1 (0.6)         | 2 (1.9)                         | 1 (0.9)         |
|                       | Segmentectomy + Wedge              | 1 (0.4)                          | 1 (0.6)         | 1 (0.9)                         | 1 (0.9)         |
|                       | Left lateral sectionectomy + Wedge | 0 (0)                            | 1 (0.6)         | 0 (0)                           | 0 (0)           |

**eTable 2. Multivariable Cox proportional hazards regression for OS**

| Variable                            | Level                   | Multivariable analysis |           |         |
|-------------------------------------|-------------------------|------------------------|-----------|---------|
|                                     |                         | HR                     | 95% CI    | P-value |
| Surgical approach                   | Open                    | Ref.                   | -         | -       |
|                                     | Robotic                 | 0.51                   | 0.26-1.01 | 0.053   |
| Age, y                              | +1 y                    | 0.95                   | 0.92-0.98 | 0.004   |
| BMI, kg/m <sup>2</sup>              | +1 kg/m <sup>2</sup>    | 0.96                   | 0.91-1.02 | 0.20    |
| Charlson comorbidity index          | +1                      | 1.19                   | 0.95-1.49 | 0.13    |
| Platelet count, 10 <sup>3</sup> /μL | +10 10 <sup>3</sup> /μL | 0.98                   | 0.95-1.02 | 0.31    |
| IWATE difficulty score              | +1                      | 1.01                   | 0.91-1.12 | 0.84    |
| ERASL-pre score                     | +1                      | 1.63                   | 1.04-2.58 | 0.035   |
| CHILD                               | Child A                 | Ref.                   | -         | -       |
|                                     | Child B                 | 1.56                   | 0.56-4.37 | 0.40    |
| Number of nodules                   | 1                       | Ref.                   | -         | -       |
|                                     | 2-3-4                   | 1.40                   | 0.80-2.44 | 0.24    |
| Grading                             | +1 G                    | 1.25                   | 0.81-1.92 | 0.31    |
| Microvascular invasion              | No                      | Ref.                   | -         | -       |
|                                     | Yes                     | 1.39                   | 0.79-2.43 | 0.25    |

List of abbreviations: y: years; G: grade.

**eFigure.** Overall Survival and Cumulative Incidence of Death Related to Tumor Recurrence After Propensity Score Matching by Type of Surgery Among Patients Within Milan Criteria

Overall survival after propensity score matching, by type of surgery, among Milan-In patients (Panel A), and Cumulative incidence of death related to tumor recurrence after propensity score matching, by type of surgery, among Milan-In patients (Panel B)

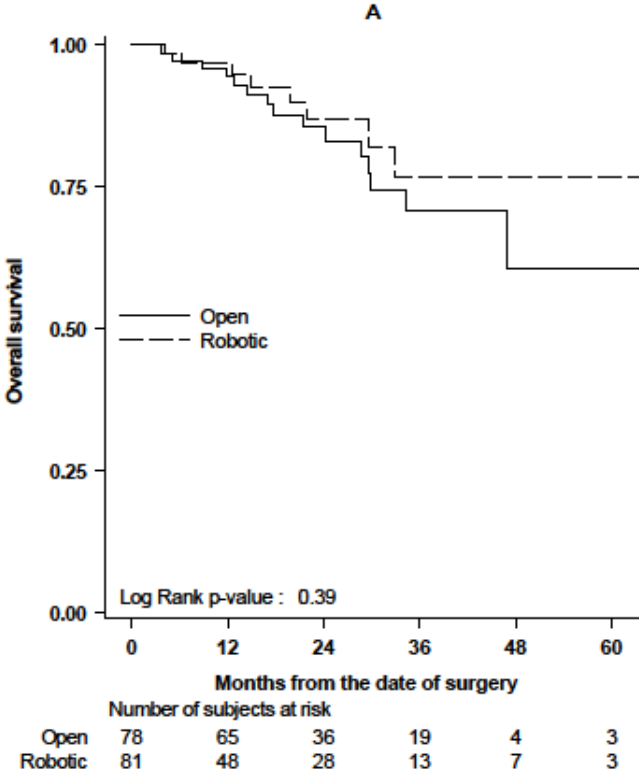

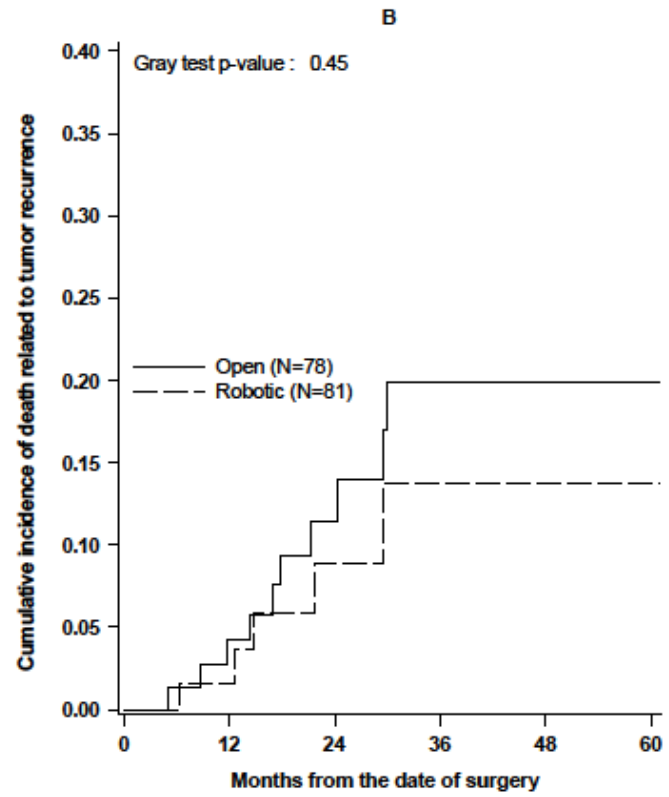

Supplement: jamasurg-e225697-s001.pdf [file jamasurg-e225697-s001.pdf]
