# Supplementary material
Source: PubMed Central journal article supplement (PMC9685546)
Supplement: jamasurg-e225697-s002.pdf [file jamasurg-e225697-s002.pdf]

\*First name, last name, and suffix (if applicable) are required and will appear in PubMed.

| <b>*Group Name(s): Robotic HPB Study Group</b> |                   |                              |                  |                                                                                                                                                                                           |                                          |                                                         |                                                                                            |
|------------------------------------------------|-------------------|------------------------------|------------------|-------------------------------------------------------------------------------------------------------------------------------------------------------------------------------------------|------------------------------------------|---------------------------------------------------------|--------------------------------------------------------------------------------------------|
| <b>*First Name and Middle Initial(s)</b>       | <b>*Last Name</b> | <b>*Suffix (eg, Jr, III)</b> | Academic Degrees | Institution                                                                                                                                                                               | Location (city, state/province, country) | Role or Contribution, eg, chair, principal investigator | Group (if more than 1 Group listed in the byline) and/or Subgroup (eg, Steering Committee) |
| Barbara                                        | Catellani         |                              | MD               | Hepato-pancreato-biliary Surgery and Liver Transplantation Unit, University of Modena and Reggio Emilia, Modena, Italy                                                                    | Modena, Italy                            | further data collection                                 |                                                                                            |
| Gian Piero                                     | Guerrini          |                              | MD               | Hepato-pancreato-biliary Surgery and Liver Transplantation Unit, University of Modena and Reggio Emilia, Modena, Italy                                                                    | Modena, Italy                            | further data collection                                 |                                                                                            |
| Jorgelina                                      | Coppa             |                              | MD               | Department of Oncology and Hemato-Oncology, University of Milan, Milan, Italy; HPB Surgery, and Liver Transplantation, Fondazione IRCCS Istituto Nazionale Tumori di Milano, Milan, Italy | Milan, Italy                             | further data collection                                 |                                                                                            |
| Maria                                          | Flores            |                              | MD               | Department of Oncology and Hemato-Oncology, University of Milan, Milan, Italy; HPB Surgery, and Liver Transplantation, Fondazione IRCCS Istituto Nazionale Tumori di Milano, Milan, Italy | Milan, Italy                             | further data collection                                 |                                                                                            |
